CORRECTION

# Correction: A Physically-Modified Saline Suppresses Neuronal Apoptosis, Attenuates Tau Phosphorylation and Protects Memory in an Animal Model of Alzheimer's Disease

Khushbu K. Modi, Arundhati Jana, Supurna Ghosh, Richard Watson, Kalipada Pahan

In [Fig 9B](#), the images in row Tg-FADX are incorrectly duplicates of the images in row Tg+NS, due to an error during preparation of the figure.

Here we provide a corrected [Fig 9](#). The underlying images are provided as supporting information files. The authors confirm that these changes do not alter their findings.

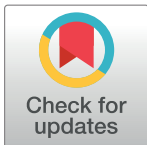

**OPEN ACCESS**

**Citation:** Modi KK, Jana A, Ghosh S, Watson R, Pahan K (2017) Correction: A Physically-Modified Saline Suppresses Neuronal Apoptosis, Attenuates Tau Phosphorylation and Protects Memory in an Animal Model of Alzheimer's Disease. PLoS ONE 12(6): e0180602. <https://doi.org/10.1371/journal.pone.0180602>

**Published:** June 27, 2017

**Copyright:** © 2017 Modi et al. This is an open access article distributed under the terms of the [Creative Commons Attribution License](#), which permits unrestricted use, distribution, and reproduction in any medium, provided the original author and source are credited.

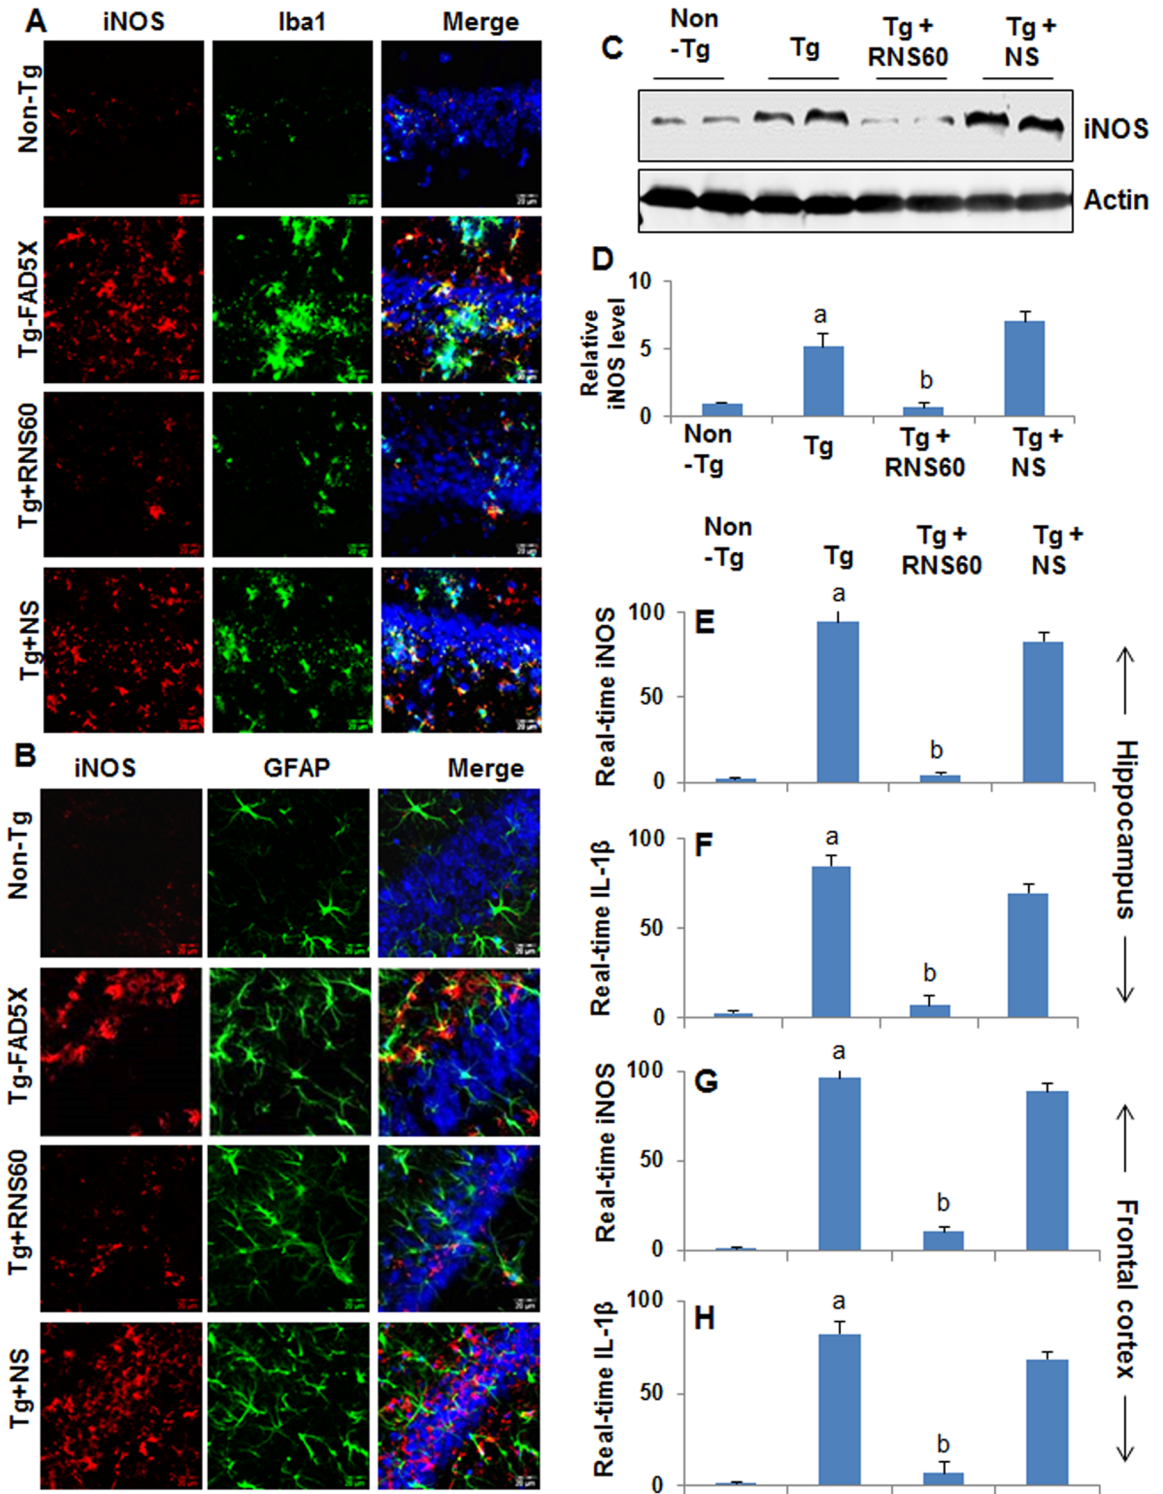

**Fig 9. RNS60 treatment reduces glial activation in the hippocampus of Tg 5XFAD mice.** Tg mice (5 months old) were treated with RNS60 and NS (300  $\mu$ l/mouse/2d) via i.p. injection and after 2 months of treatment, hippocampal (CA1) sections were double-labeled for iNOS and either Iba1 (microglia) (A) or GFAP (astroglia) (B). The protein level of iNOS was analyzed in hippocampal homogenates by Western blot (C). Bands were scanned and results presented as iNOS/Actin (D). Results represent mean  $\pm$  SEM of four mice per group. <sup>a</sup> $p < 0.001$  vs non-Tg; <sup>b</sup> $p < 0.001$  vs Tg. The mRNA expression of iNOS (E & G) and IL-1 $\beta$  (F & H) was analyzed in hippocampal (E & F) and frontal cortex (G & H) samples by real-time PCR. Results represent mean  $\pm$  SEM of four mice per group. <sup>a</sup> $p < 0.001$  vs non-Tg; <sup>b</sup> $p < 0.001$  vs Tg.

<https://doi.org/10.1371/journal.pone.0180602.g001>

## Supporting information

**S1 File. Underlying images for TG-FAD5X.**

(JPG)

**S2 File. Underlying images for TG+NS.**

(JPG)

## Reference

1. Modi KK, Jana A, Ghosh S, Watson R, Pahan K (2014) A Physically-Modified Saline Suppresses Neuronal Apoptosis, Attenuates Tau Phosphorylation and Protects Memory in an Animal Model of Alzheimer's Disease. PLoS ONE 9(8): e103606. <https://doi.org/10.1371/journal.pone.0103606> PMID: [25089827](https://pubmed.ncbi.nlm.nih.gov/25089827/)
